# Supplementary material for: Comprehensive Definition of the SigH Regulon of Mycobacterium tuberculosis Reveals Transcriptional Control of Diverse Stress Responses
Source: PubMed Central journal article supplement (PMC4803200; doi:10.1371/journal.pone.0152145), 2016-03-22

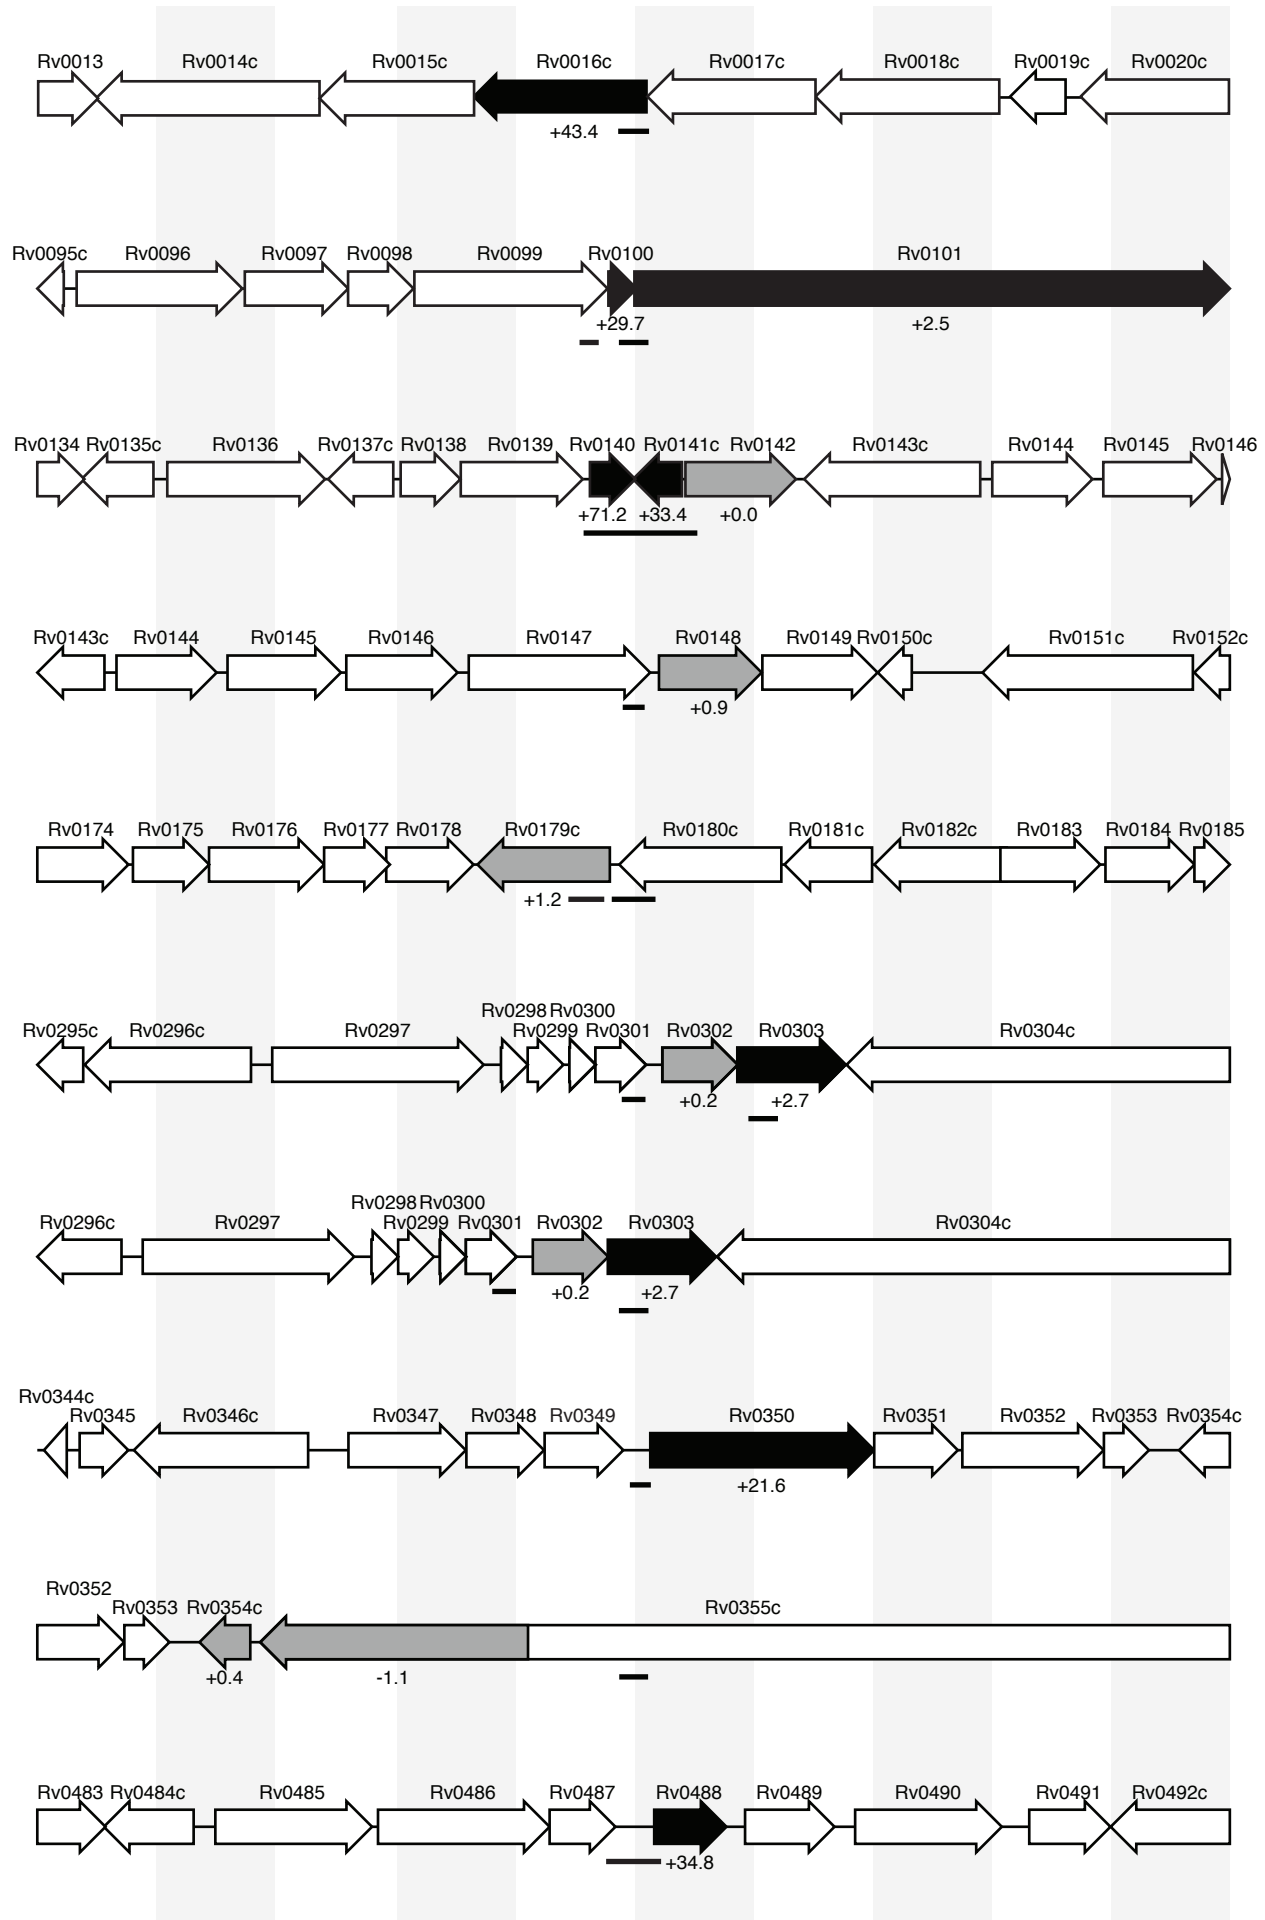

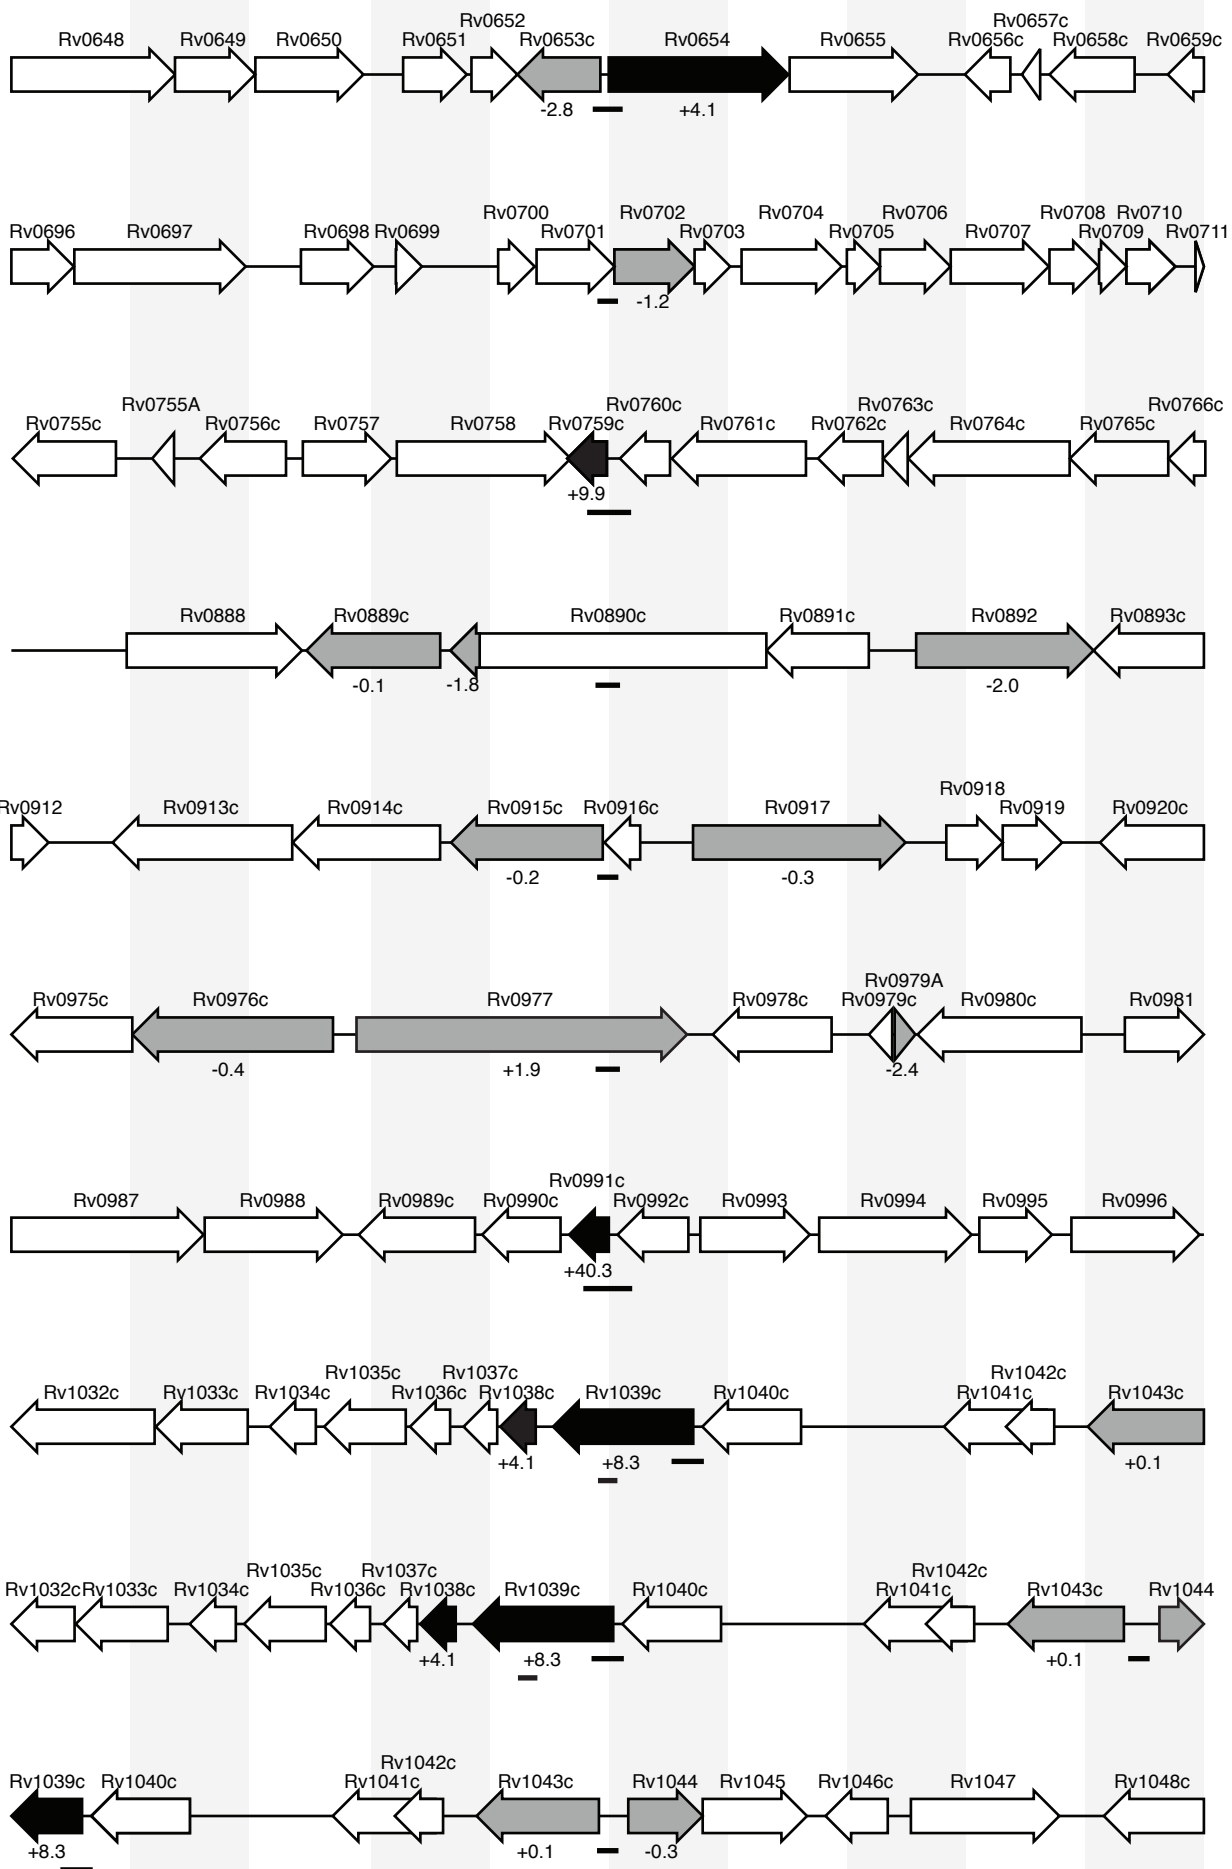

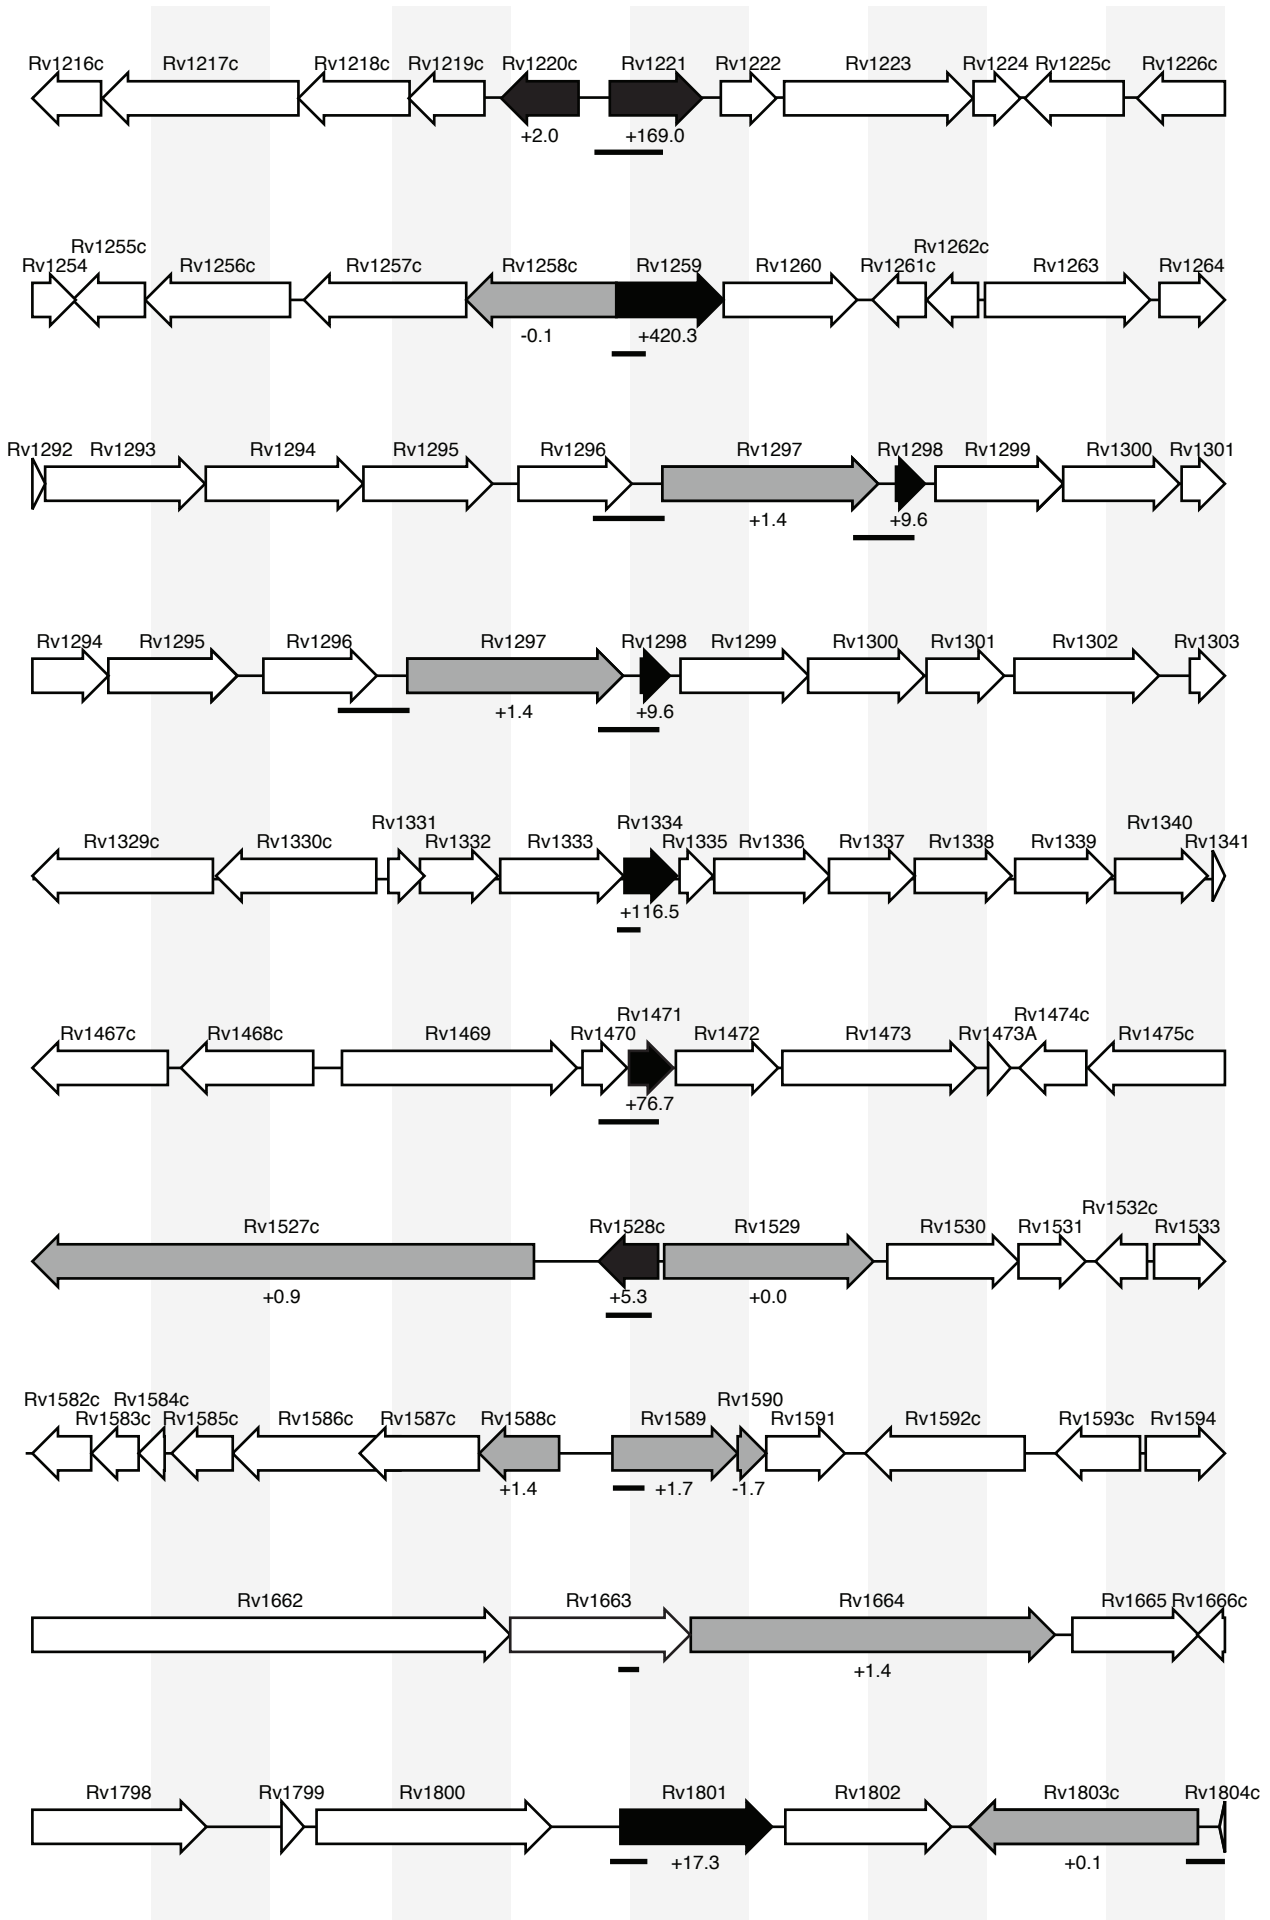

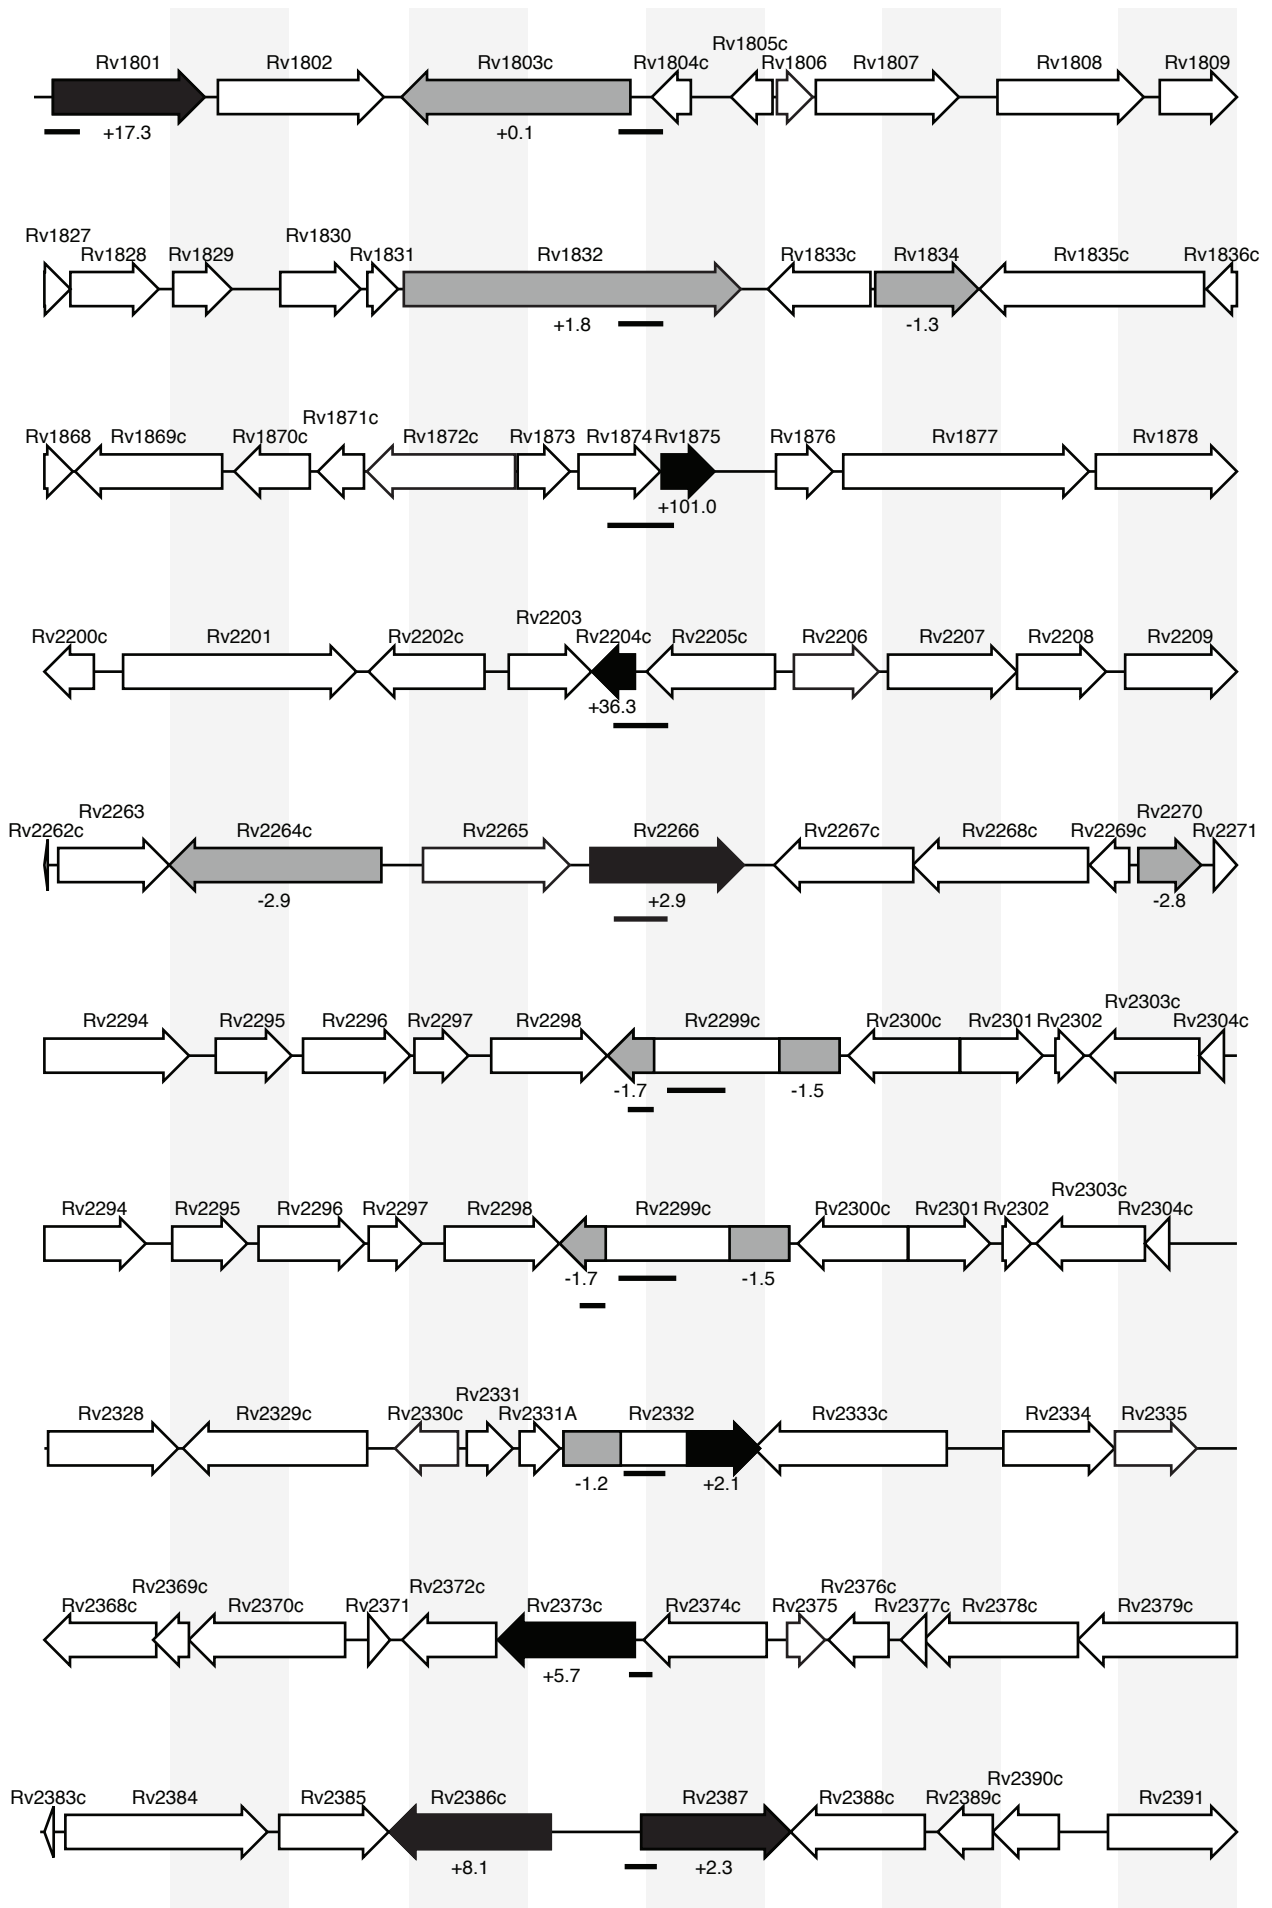

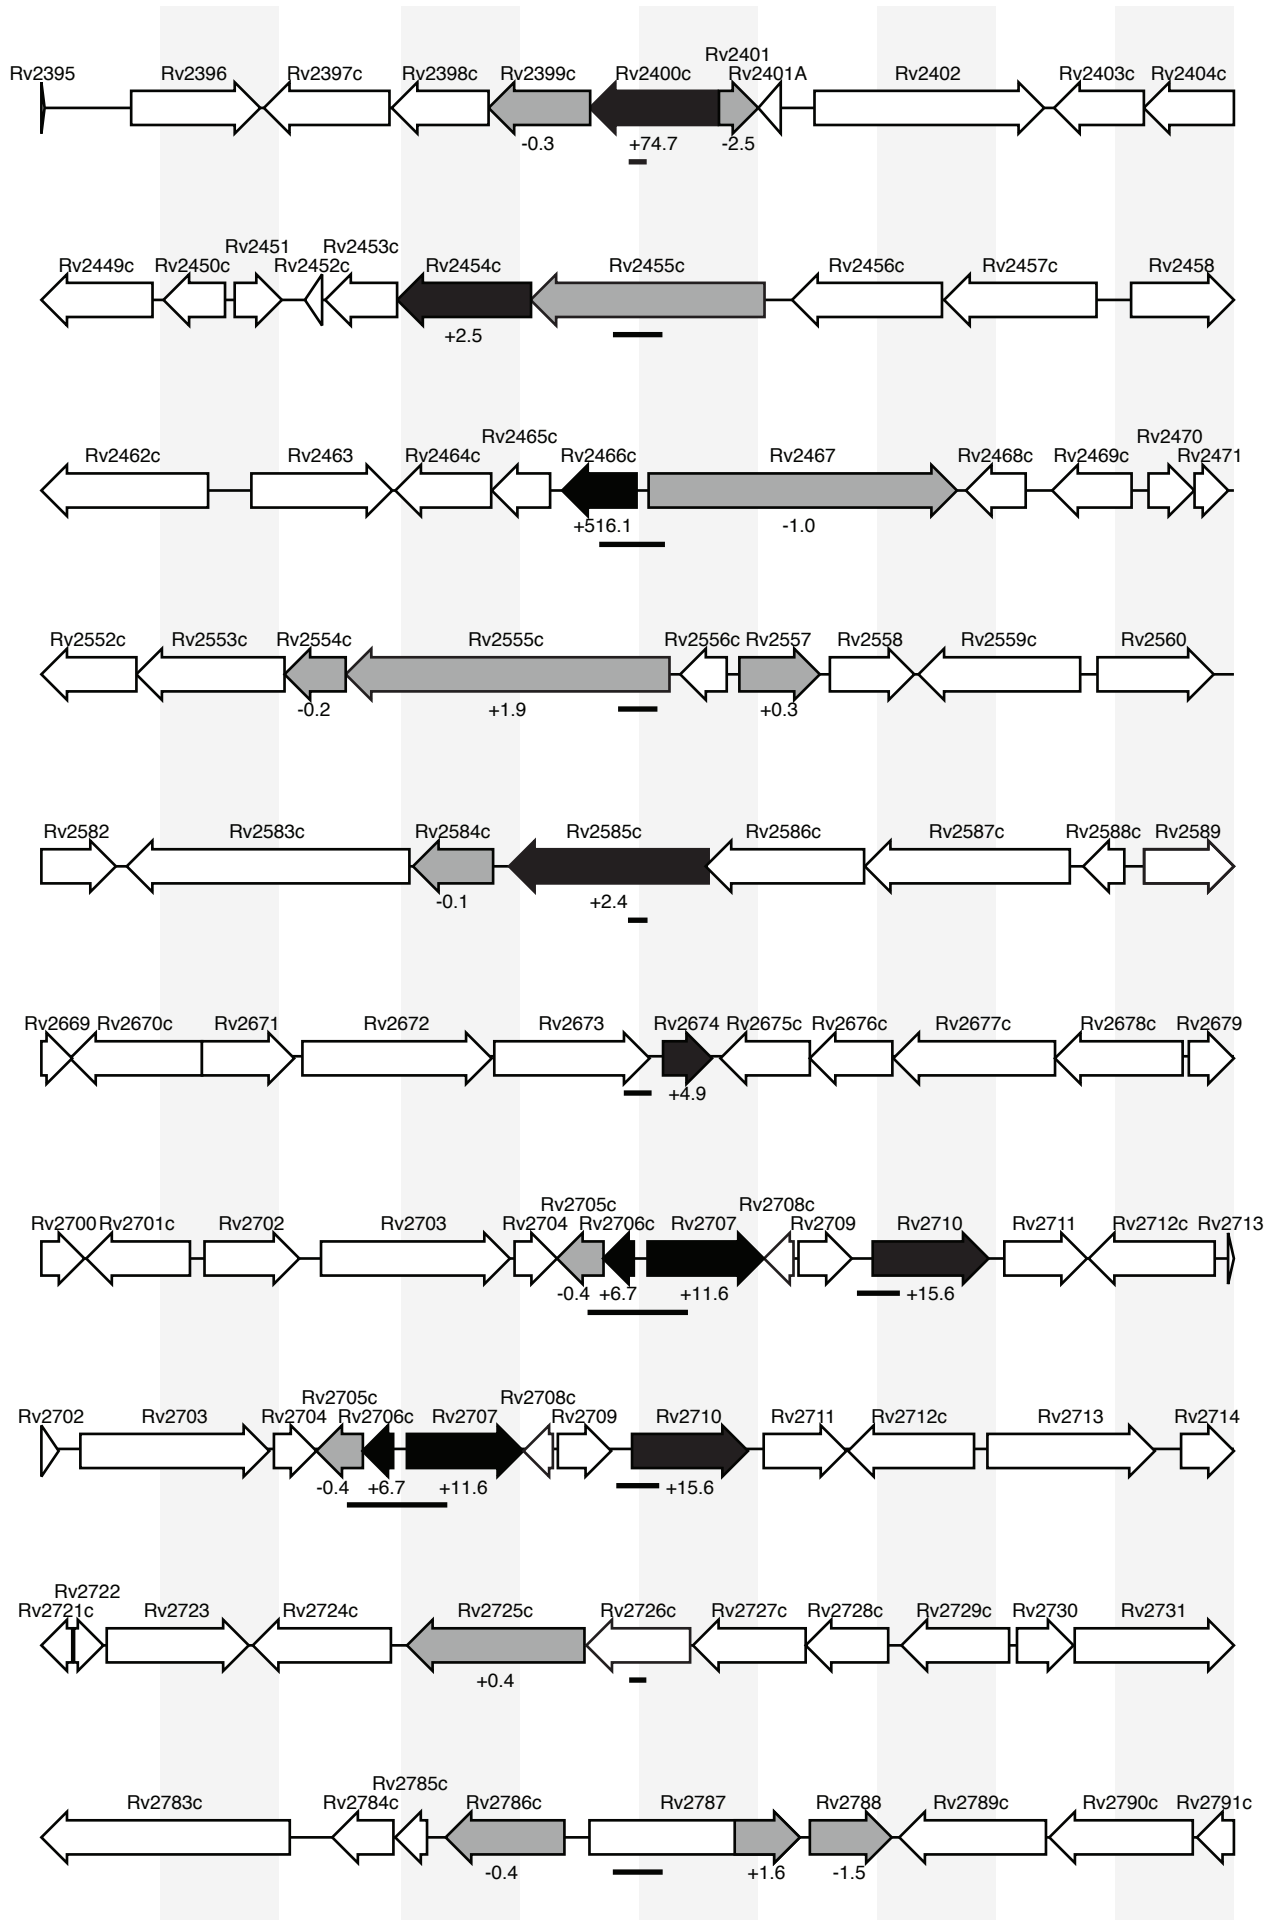

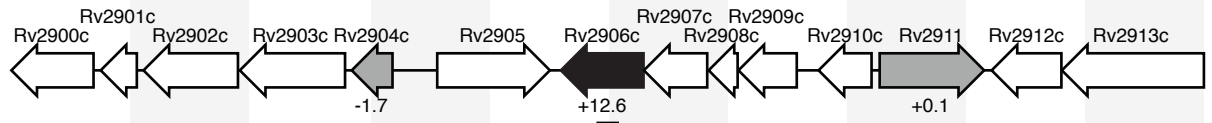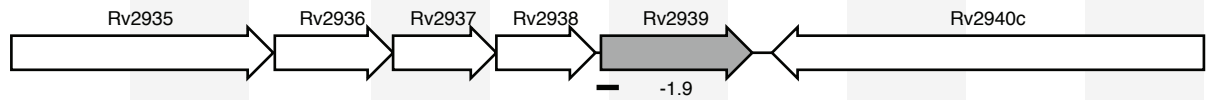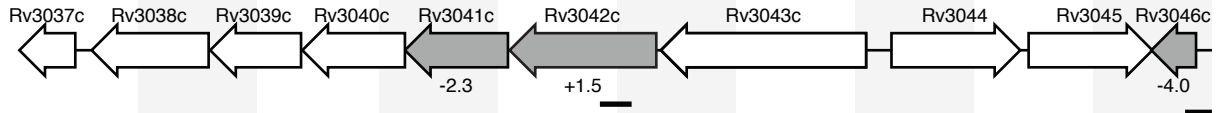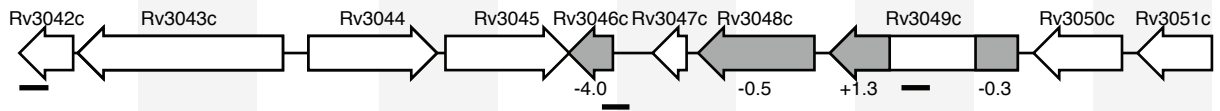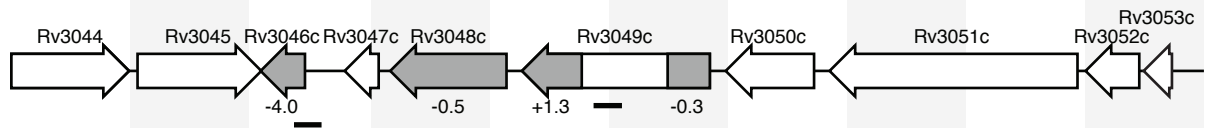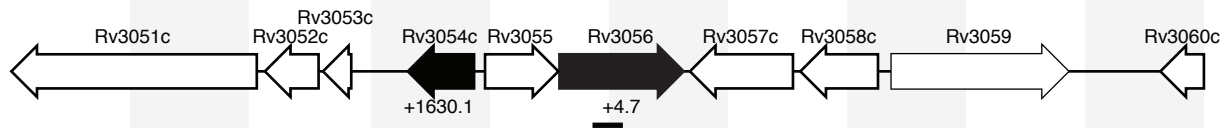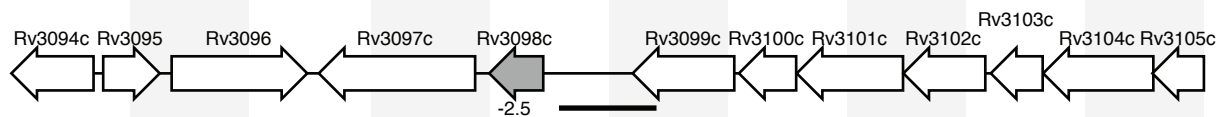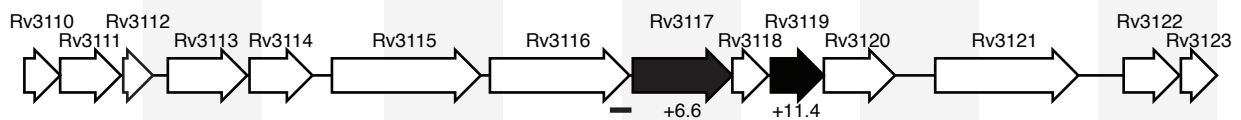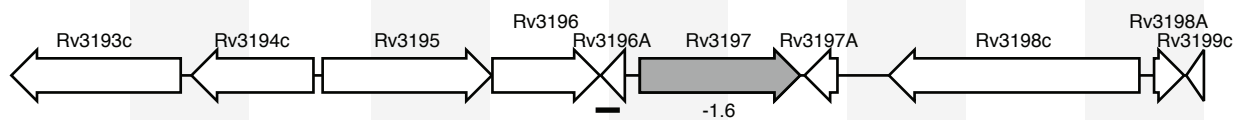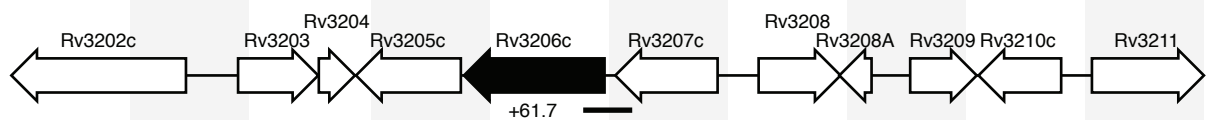

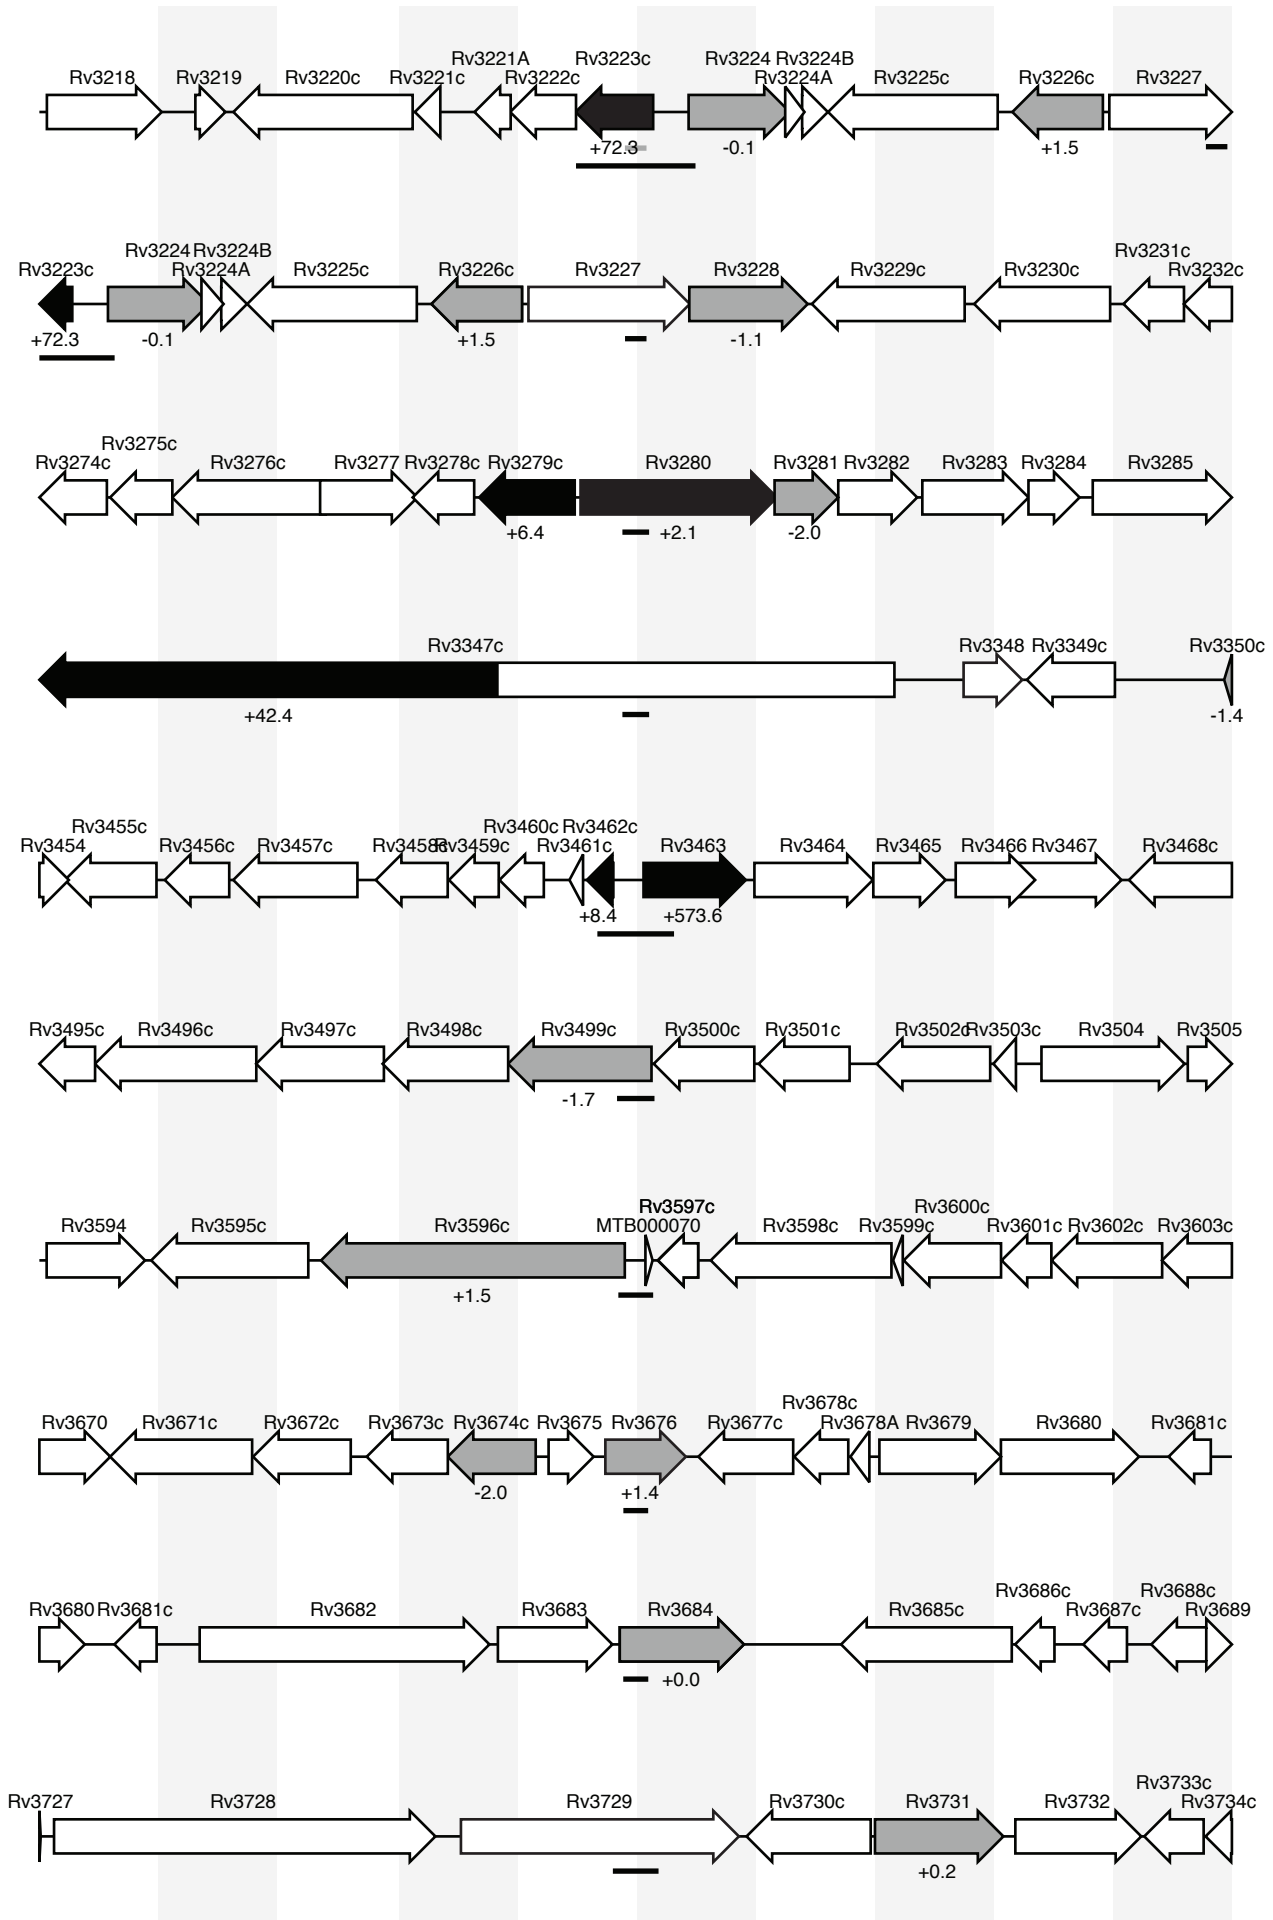

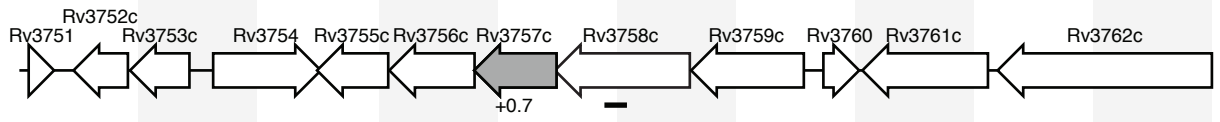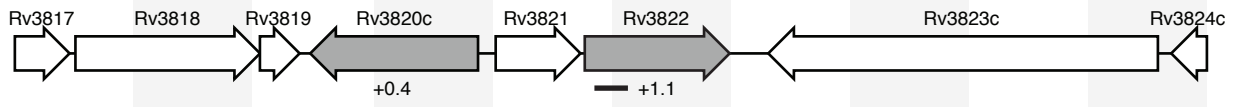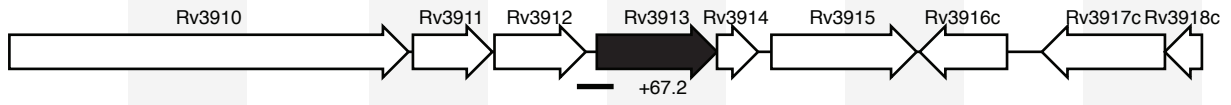

Supplement: pone.0152145.s001.pdf [file pone.0152145.s001.pdf]
