# Supplementary material for: Comprehensive Definition of the SigH Regulon of Mycobacterium tuberculosis Reveals Transcriptional Control of Diverse Stress Responses
Source: PubMed Central journal article supplement (PMC4803200; doi:10.1371/journal.pone.0152145), 2016-03-22
Supplement: pone.0152145.s003.pdf [file pone.0152145.s003.pdf]

**Table S2.** Primers used for 5' RACE

|                      |                                                |                                  |
|----------------------|------------------------------------------------|----------------------------------|
| <b>Adapter</b>       | GCUGAUGGCGAUGAAUGAACACUGCGUUUGCUGGCCUUUGAUGAAA |                                  |
| <b>Outer forward</b> | GCTGATGGCGATGAATGAACACTG                       |                                  |
| <b>Inner forward</b> | CGCGGATCCGAACACTGCGTTTGCTGGCTTTGATG            |                                  |
| <b>Rv No.</b>        | <b>GSP1 (Outer PCR Reverse)</b>                | <b>GSP2 (Inner PCR Reverse)</b>  |
| Rv0016c              | GCTACCGAGTACGCCAGCAGTTG                        | GCTGCCGTGAATACTCGTCGAGCAACACTC   |
| Rv0100               | CCGCCTCGTCGATATACAACACGTC                      | CCACGAACGACCACTCTGGCCTTGTCTG     |
| Rv0101               | CTGCAGGTGCTCATCGGCTGAC                         | CGGATAGTCTGCCCCCGAATTCTCCAGGAC   |
| Rv0140               | CACCTCGCCATTGACGCGTACC                         | GTCGGCTCGATGGTGATCGGGTGATCG      |
| Rv0141c              | TCTTGTCCAATTCGGTACGGGTGAC                      | TGCTCCAGTAGGTGAAGTCGTTGCTGAG     |
| Rv0303               | GTCGTCCGGTGAACGCGATGC                          | GCATTGCACACCAGGGCACGAATCGG       |
| Rv0350               | CGAGCCATGGTGAATCCTCCTGAATATG                   | CACTATGATGAGTGCACCCCGCTCAAG      |
| Rv0488               | AATCAGTGCCCCATCAGCGATCC                        | GACCAGCACGTATTCTCGCCTAATTCCTTGGC |
| Rv0654               | GATAACGCCCGTCGAGGTGTTCC                        | CGCCAGGAAGCCCTCGAGATATGGGTTTTG   |
| Rv0759c              | GTCATCGGCTCAATCGTCAAGAACG                      | CCGGGCAGTTCACGGTTGATGATCTTGGTG   |
| Rv0991c              | GTAGAAGCCGGTGCCTTTGAACACC                      | TGAACAGCTTGCGCAGCCGGCCAGAACACC   |
| Rv1038c              | GCTAGGAATATCGCGGTGGGGATG                       | CTGCGCTGTTGATGATGTTTGCCACGAACG   |
| Rv1039c              | GTCATCGCATAGGCCGCCTCGTAG                       | CGCAGCGGCTTCGGCCGGTGTAG          |
| Rv1259               | CGTTGAGTTCGCAGATCGAG                           | GTCTGCGGTGTCGCCGGATCAC           |
| Rv1298               | ATTGCCGCATCCGCAGACCACGGTGG                     | AGCATCGATTATGCCAGGTCAACCG        |
| Rv1334               | CAGCACTCCGCAGGCTTCGTC                          | ATGGGCCACCATCGCATTACCAGGTC       |
| Rv1471               | GTCGGGGTGTTCCTCCGACGACTC                       | TAATCGACGAGCACCATGTCGCTGCTTTGG   |
| Rv1801               | CAAAGCCGATAGCTCCGAGGCGTAG                      | GTAGCCAGCCGCTGTTGCGTGCAG         |
| Rv1875               | TCGATGTTCTGGTTGGCACCGAATG                      | CGGCTTATCCGATTCCGCAGATCGTTGTCCG  |
| Rv2204c              | TGGGGAAAATCCCACTTCTCAACG                       | GGTACCCTGAAGGACCGCTATTCCCGAGTC   |
| Rv2332               | CTGTATACGGCGGCCAAGACCAC                        | TCGTTGAACACGCAGTAATCCGTGCCGTATG  |
| Rv2373c              | GTGCCACGCTTGATTCTCCTATGCC                      | CTCCTATGCCGCGTCTTTATGCCGCTTCTC   |
| Rv2387               | CGGCTTGATCTTGGCGAGTTCTTCG                      | GCAGCAGATACAGGGTTAGGCCCTGGTAGAG  |
| RV2466c              | AGTTCACCTCGATGTCGCGGACCT                       | GCGGATCGAACCAGAAATCGGCCAGACAGAC  |
| Rv2674               | CGTCATGGGTCCACGCTAGTCC                         | TGGATCGATACCGCCGTCCAGCCGGTTGTC   |
| Rv2706c              | AGTCCTGAGCTGACTAGAGCAGACC                      | CCCTCCGGAGCCGAGCTTCTTTTCTGC      |
| Rv2707               | AAGATCGAGTCGTCCCAGCTTTTGG                      | GTCGTCCAGCTTTTGGACAAAGTCTACGG    |
| Rv3049c              | CACCGCGGGGTAATAGGTAGAGGAG                      | GAGGAGTTCAGGATCCGTTTGCAGCCGATG   |
| Rv3054c              | GACGGTGACCGCTCCGGAGCGAC                        | ACGATGCCCTGAGGCCACCTTCTTGC       |
| Rv3119               | GGTCATATGCACTGGTGTCTCTGTC                      | CTCGTCCACTTCGACGAAAACGACCTTCGG   |
| Rv3206c              | CCGTCAACACCCAGGTCAGGAATG                       | GTCAGGAATGATGAGATGGCGGCTGTAGCG   |
| Rv3279c              | GGATGAGGATTCGTTTCGTGAGCTG                      | GCCAAACACCCGAGCACCAACTTCAATCTC   |
| Rv3347c              | GCCAAACCCACGTTCAAGTCG                          | CTGCCACATCGGCCAACCCGAGATTGATG    |
| Rv3462c              | CGAATGTAGTGCTGACGCATCTTGC                      | TCTCCAGCTCAATGCGGAACATGGCATTGG   |
| Rv3463               | GTAGCCCAGCGCCTCGATTTCTGTG                      | GCGCCTCGATTTCTGTGGCCTGCTG        |
| Rv3913               | GGGACCGGAGCCGATAACGATCAC                       | CACGTCGCGAACGGGGTGGTGTG          |
