# Supplementary material for: Comprehensive Definition of the SigH Regulon of Mycobacterium tuberculosis Reveals Transcriptional Control of Diverse Stress Responses
Source: PLoS One. 2016 Mar 22;11(3):e0152145. doi: 10.1371/journal.pone.0152145 (PMC4803200; doi:10.1371/journal.pone.0152145)
Supplement: S3 Table — (XLSX) [file pone.0152145.s004.xlsx]

## Sheet: Sheet1
Table S3. ChIP-Seq binding data
GENE coordinates							ChIP-SEQ binding site coordinates						ChIP-Seq signal (mean normalized enrichment)						qRT-PCR
LOCUS	SYMBOL	LENGTH	START	STOP	STRAND	Site #	START	STOP	START	STOP	SIZE		sigH-FLAG (wt)	sigH-FLAG (ΔsigH)	vector control (ΔsigH)	Mean sigH-FLAG	Std Dev sigH-FLAG	ratio sigH-FLAG mean/vector	ratio wt/ΔsigH
Rv0016c	pbpA	1476	18759	20234	-	1	19979	20237	255	-3	258		12.7	12.8	3.3	12.75	0.0707107	3.86364	43.4
Rv0101	nrp	7539	110001	117539	+	2	109871	110118	-130	117	247		8.6	11.9	0.9	10.25	2.33345	11.3889	2.5
Rv0140	Rv0140	381	166910	167290	+	3	166800	167753	-110	843	953		13.6	12.3	3.3	12.95	0.919239	3.92424	71.2
Rv0141c	Rv0141c	411	167271	167681	-	3	166800	167753	881	-72	953		13.6	12.3	3.3	12.95	0.919239	3.92424	33.4
Rv0142	Rv0142	927	167711	168637	+	3	166800	167753	-911	42	953		13.6	12.3	3.3	12.95	0.919239	3.92424	0
Rv0148	Rv0148	861	174833	175693	+	4	174529	174712	-304	-121	183		12.5	12.8	1.9	12.65	0.212132	6.65789	0.9
Rv0179c	lprO	1110	209703	210812	-	5	210829	211195	-17	-383	366		12.5	13.1	4.3	12.8	0.424264	2.97674	1.3
Rv0302	Rv0302	633	364605	365237	+	6	364265	364463	-340	-142	198		7.5	9.1	3	8.3	1.13137	2.76667	0.2
Rv0303	Rv0303	909	365234	366142	+	7	365327	365574	93	340	247		9.3	10.6	2.4	9.95	0.919239	4.14583	2.7
Rv0350	dnaK	1878	419835	421712	+	8	419664	419839	-171	4	175		6.4	7.4	2.9	6.9	0.707107	2.37931	21.6
Rv0354c	PPE7	426	424269	424694	-	9	427789	428030	-3095	-3336	241		9.6	7.7	3.6	8.65	1.3435	2.40278	0.4
Rv0355c	PPE8	9903	424777	434679	-	9	427789	428030	6890	6649	241		9.6	7.7	3.6	8.65	1.3435	2.40278	-1.1
Rv0653c	Rv0653c	696	749234	749929	-	10	749866	750116	63	-187	250		16.7	21.8	3.5	19.25	3.60624	5.5	-2.8
Rv0654	Rv0654	1506	750000	751505	+	10	749866	750116	-134	116	250		16.7	21.8	3.5	19.25	3.60624	5.5	4.1
Rv0702	rplD	672	801462	802133	+	11	801319	801491	-143	29	172		5.9	9.6	1.9	7.75	2.6163	4.07895	-1.2
Rv0759c	Rv0759c	333	853825	854157	-	12	853992	854360	165	-203	368		16.5	21.3	3.2	18.9	3.39411	5.90625	9.9
Rv0889c	citA	1122	988740	989861	-	12	991164	991369	-1303	-1508	205		7.2	7.7	1.9	7.45	0.353553	3.92105	-0.1
Rv0890c	Rv0890c	2649	989948	992596	-	12	991164	991369	1432	1227	205		7.2	7.7	1.9	7.45	0.353553	3.92105	-0.1
Rv0892	Rv0892	1488	993853	995340	+	12	991164	991369	-2689	-2484	205		7.2	7.7	1.9	7.45	0.353553	3.92105	-0.2
Rv0976c	Rv0976c	1683	1088493	1090175	-	13	1092378	1092581	-2203	-2406	203		9.2	8.6	2.4	8.9	0.424264	3.70833	-0.4
Rv0977	PE_PGRS 16	1683	1088493	1090175	-	13	1092378	1092581	-2203	-2406	203		9.2	8.6	2.4	8.9	0.424264	3.70833	1.9
Rv0991c	Rv0991c	333	1108172	1108504	-	14	1108291	1108700	213	-196	409		30.2	24.5	5.2	27.35	4.03051	5.25962	40.3
Rv1039c	PPE15	1176	1161297	1162472	-	15	1161674	1161836	798	636	162		7.9	6.7	1.7	7.3	0.848528	4.29412	8.3
Rv1038c	esxJ	297	1160855	1161151	-	15	1161674	1161836	-523	-685	162		7.9	6.7	1.7	7.3	0.848528	4.29412	2
Rv1043c	Rv1043c	1026	1165781	1166806	-	16	1166791	1166970	15	-164	179		5.3	7.7	2	6.5	1.69706	3.25	0.1
Rv1044	Rv1044	624	1167053	1167676	+	16	1166791	1166970	-262	-83	179		5.3	7.7	2	6.5	1.69706	3.25	-0.3
Rv1220c	Rv1220c	648	1363503	1364150	-	17	1364284	1364858	-134	-708	574		56	74.7	4.1	65.35	13.2229	15.939	2
Rv1221	sigE	774	1364413	1365186	+	17	1364284	1364858	-129	445	574		56	74.7	4.1	65.35	13.2229	15.939	169
Rv1258c	Rv1258c	1260	1406081	1407340	-	18	1407301	1407586	39	-246	285		5.4	8.2	1.5	6.8	1.9799	4.53333	-0.1
Rv1259	udgB	900	1407339	1408238	+	18	1407301	1407586	-38	247	285		5.4	8.2	1.5	6.8	1.9799	4.53333	420.3
Rv1297	rho	1809	1453204	1455012	+	19	1452621	1453222	-583	18	601		23	31.5	3.2	27.25	6.01041	8.51562	1.4
Rv1298	rpmE	243	1455163	1455405	+	20	1454803	1455317	-360	154	514		23	31.5	3.2	27.25	6.01041	8.51562	9.6
Rv1334	mec	441	1502641	1503081	+	21	1502578	1502775	-63	134	197		9.3	6	2.6	7.65	2.33345	2.94231	116.5
Rv1471	trxB1	372	1659370	1659741	+	22	1659114	1659620	-256	250	506		27.5	31.1	3.5	29.3	2.54558	8.37143	76.7
Rv1527c	pks5	6327	1722083	1728409	-	23	1729012	1729397	-603	-988	385		17.5	24.1	0.7	20.8	4.6669	29.7143	0.9
Rv1528c	papA4	498	1728953	1729450	-	23	1729012	1729397	438	53	385		17.5	24.1	0.7	20.8	4.6669	29.7143	5.3
Rv1529	fadD24	1755	1729502	1731256	+	23	1729012	1729397	-490	-105	385		17.5	24.1	0.7	20.8	4.6669	29.7143	0
Rv1588c	RV1588c	516	1786584	1787099	-	24	1790288	1790552	-3189	-3453	264		8.2	7.8	2.7	8	0.282843	2.96296	1.4
Rv1589	bioB	1050	1790284	1791333	+	24	1790288	1790552	4	268	264		8.2	7.8	2.7	8	0.282843	2.96296	1.7
Rv1664	pks9	3054	1888026	1891079	+	25	1887418	1887592	-608	-434	174		8.8	8.5	1.3	8.65	0.212132	6.65385	1.4
Rv1801	PPE29	1272	2042001	2043272	+	26	2041914	2042226	-87	225	312		15.2	17.4	1.9	16.3	1.55563	8.57895	17.3
Rv1803c	PE_PGRS32	1920	2044923	2046842	-	27	2046743	2047116	99	-274	373		33.4	64.7	3.2	49.05	22.1324	15.3281	0.1
Rv1832	gcvB	867	2079830	2080696	+	28	2077675	2078052	-2155	-1778	377		15.2	15.9	1.7	15.55	0.494975	9.14706	1.8
Rv1834	lipZ	867	2079830	2080696	+	28	2077675	2078052	-2155	-1778	377		15.2	15.9	1.7	15.55	0.494975	9.14706	-1.3
Rv1875	Rv1875	444	2124381	2124824	+	29	2123926	2124484	-455	103	558		31.6	40.8	3.2	36.2	6.50538	11.3125	101
Rv2204c	Rv2204c	357	2468931	2469287	-	30	2469108	2469567	179	-280	459		29.8	31.7	3.7	30.75	1.3435	8.31081	36.2
Rv2264c	Rv2264c	1779	2536572	2538350	-	31	2540300	2540750	-1950	-2400	450		15.3	19.4	2.6	17.35	2.89914	6.67308	-2.9
Rv2266	cyp124	1287	2540104	2541390	+	31	2540300	2540750	196	646	450		15.3	19.4	2.6	17.35	2.89914	6.67308	2.9
Rv2299c	htpG	1944	2570059	2572002	-	32	2570227	2570444	1775	1558	217		8.8	5.6	1.4	7.2	2.26274	5.14286	-1.7
Rv2332	mez	1647	2605108	2606754	+	33	2605612	2605961	504	853	349		23.5	37.8	1.3	30.65	10.1116	23.5769	2.1
Rv2373c	dnaJ2	1149	2652839	2653987	-	34	2653939	2654135	48	-148	196		10.2	7.8	3.2	9	1.69706	2.8125	5.7
Rv2386c	mbtI	1353	2678653	2680005	-	35	2680626	2680895	-621	-890	269		7.6	8.9	2.8	8.25	0.919239	2.94643	8.1
Rv2387	Rv2387	1254	2680765	2682018	+	35	2680626	2680895	-139	130	269		7.6	8.9	2.8	8.25	0.919239	2.94643	2.3
Rv2454c	Rv2454c	1122	2753625	2754746	-	36	2755434	2755848	-688	-1102	414		23.4	17.5	4	20.45	4.17193	5.1125	2.5
Rv2466c	Rv2466c	624	2768261	2768884	-	37	2768572	2769122	312	-238	550		23.5	25.1	2.3	24.3	1.13137	10.5652	516
Rv2467	pepN	2586	2768986	2771571	+	37	2768572	2769122	-414	136	550		23.5	25.1	2.3	24.3	1.13137	10.5652	-0.1
Rv2554c	Rv2554c	513	2873258	2873770	-	38	2876055	2876384	-2285	-2614	329		22.1	32.6	2.6	27.35	7.42462	10.5192	-0.2
Rv2555c	alaS	2715	2873771	2876485	-	38	2876055	2876384	430	101	329		22.1	32.6	2.6	27.35	7.42462	10.5192	1.9
Rv2557	Rv2557	675	2877072	2877746	+	38	2876055	2876384	-1017	-688	329		22.1	32.6	2.6	27.35	7.42462	10.5192	0.3
Rv2584c	apt	672	2910229	2910900	-	39	2912032	2912195	-1132	-1295	163		6.2	6	2.4	6.1	0.141421	2.54167	-0.1
Rv2585c	Rv2585c	1674	2911004	2912677	-	39	2912032	2912195	645	482	163		6.2	6	2.4	6.1	0.141421	2.54167	2.4
Rv2674	msrB	411	2990706	2991116	+	40	2990377	2990609	-329	-97	232		12.1	16.4	2.7	14.25	3.04056	5.27778	2.8
Rv2706c	Rv2706c	258	3020200	3020457	-	41	3020070	3020911	387	-454	841		34	27.4	4	30.7	4.6669	7.675	6.7
Rv2707	Rv2707	975	3020573	3021547	+	41	3020070	3020911	-503	338	841		34	27.4	4	30.7	4.6669	7.675	11.6
Rv2710	sigB	972	3022461	3023432	+	42	3022329	3022688	-132	227	359		14.5	9.8	4.6	12.15	3.3234	2.6413	15.6
Rv2725c	hflX	1488	3037427	3038914	-	43	3039290	3039433	-376	-519	143		5.2	6.1	1.6	5.65	0.636396	3.53125	0.4
Rv2786c	ribF	996	3093905	3094900	-	44	3095307	3095724	-407	-824	417		21.8	35.3	1.8	28.55	9.54594	15.8611	-0.4
Rv2787	Rv2787	1764	3095111	3096874	+	44	3095307	3095724	196	613	417		21.8	35.3	1.8	28.55	9.54594	15.8611	1.6
Rv2788	sirR	687	3096959	3097645	+	44	3095307	3095724	-1652	-1235	417		21.8	35.3	1.8	28.55	9.54594	15.8611	-1.5
Rv2906c	rplS	342	3213912	3214253	-	45	3215963	3216151	-1710	-1898	188		9	10.2	1.1	9.6	0.848528	8.72727	-1.7
Rv2911	dacB2	875	3218339	3219214	+	45	3215963	3216151	-2376	-2188	188		9	10.2	1.1	9.6	0.848528	8.72727	0.1
Rv2939	papA5	1269	3274949	3276217	+	46	3274912	3275098	-37	149	186		10.1	9.1	2.4	9.6	0.707107	4	-1.9
Rv3041c	Rv3041c	864	3401055	3401918	-	47	3402690	3402955	-772	-1037	265		12	13.3	2.4	12.65	0.919239	5.27083	-2.3
Rv3042c	serB2	1230	3401933	3403162	-	47	3402690	3402955	472	207	265		12	13.3	2.4	12.65	0.919239	5.27083	1.5
Rv3046c	Rv3046c	375	3407314	3407688	-	48	3407597	3407827	91	-139	230		11.3	10.3	2.7	10.8	0.707107	4	-4
Rv3048c	nrdF2	975	3408404	3409378	-	49	3410109	3410346	-731	-968	237		13.1	12.5	2.2	12.8	0.424264	5.81818	-0.5
Rv3049c	Rv3049c	1575	3409509	3411083	-	49	3410109	3410346	974	737	237		13.1	12.5	2.2	12.8	0.424264	5.81818	1.3
Rv3054c	Rv3054c	555	3415435	3415989	-	50	3416982	3417236	-993	-1247	254		10.7	8.1	2.1	9.4	1.83848	4.47619	1630
Rv3056	dinP	1041	3416705	3417745		50	3416982	3417236	277	531	254		12	13.3	2.4	12.7	0.919239	5.3	4.7
Rv3098c	Rv3098c	453	3467210	3467662	-	51	3467795	3468612	-133	-950	817		27.8	28.9	4.7	28.35	0.777817	6.03191	-2.8
Rv3206c	moeB1	1179	3582532	3583710	-	52	3583532	3583942	178	-232	410		24.9	22.4	2.6	23.65	1.76777	9.09615	61.7
Rv3223c	sigH	651	3598901	3599551	-	53	3598905	3599906	646	-355	1001		42.2	39.3	3.2	40.75	2.05061	12.7344	72.3
Rv3226c	Rv3226c	759	3602564	3603322	-	54	3604187	3604366	-865	-1044	179		7.6	8.4	2.1	8	0.565685	3.80952	1.5
Rv3228	Rv3228	993	3604726	3605718	+	54	3604187	3604366	-539	-360	179		7.6	8.4	2.1	8	0.565685	3.80952	-1.1
Rv3279c	birA	801	3661212	3662012	-	55	3662413	3662636	-401	-624	223		13.6	13.8	2.4	13.7	0.141421	5.70833	6.4
Rv3280	accD5	1647	3662062	3663708	+	55	3662413	3662636	351	574	223		13.6	13.8	2.4	13.7	0.141421	5.70833	2.1
Rv3281	accE5	534	3663689	3664222	+	55	3662413	3662636	-1276	-1053	223		13.6	13.8	2.4	13.7	0.141421	5.70833	-2
Rv3347c	PPE55	9474	3743711	3753184	-	56	3750904	3751127	2280	2057	223		8.4	7.1	2.3	7.75	0.919239	3.36957	42.4
Rv3462c	infA	222	3880432	3880653	-	57	3880520	3881162	133	-509	642		22.7	14.4	6	18.55	5.86899	3.09167	8.4
Rv3463	Rv3463	858	3880907	3881764	+	57	3880520	3881162	-387	255	642		22.7	14.4	6	18.55	5.86899	3.09167	573.6
Rv3596c	clpC1	2547	4038158	4040704	-	58	4040651	4040942	53	-238	291		18.3	17.4	3.6	17.85	0.636396	4.95833	1.5
Rv3684	Rv3684	1041	4125439	4126479	+	59	4125468	4125677	29	238	209		7.6	8.1	2.7	7.85	0.353553	2.90741	0
Rv3731	ligC	1077	4181758	4182834	+	60	4179559	4179941	-2199	-1817	382		15.4	16.8	3	16.1	0.989949	5.36667	0.2
Rv3757c	proW	690	4202610	4203299	-	61	4203702	4203890	-403	-591	188		5.6	6.6	1.8	6.1	0.707107	3.38889	0.7
Rv3913	trxB2	1008	4401728	4402735	+	62	4401561	4401868	-167	140	307		19.6	19.3	2	19.45	0.212132	9.725	67.2
Additional sites identified by manual inspection
Rv0100*	Rv0100	237	109783	110019	+	J1	109541	109701	-242	-82	160								29.7
Rv0179c*	lprO	1110	209703	210812	-	J2	210501	210801	311	11	300								1.3
Rv0488	Rv0488	606	577664	578269	+	J3	577261	577721	-403	57	460								34.8
Rv1039c*	PPE15	1176	1161297	1162472	-	J4	1162291	1162561	181	-89	270								8.3
Rv2399c	cysT	852	2695796	2696647	-	J5	2696971	2697121	-324	-474	150								-0.3
Rv2400c	subI	852	2696644	2697714	-	J5	2696971	2697121	743	593	150								74.7
Rv3117 (Rv3119)	cysA3	834	3483974	3484807	+	J6	3483781	3483961	-193	-13	180								6.6
Rv3820c	papA2	1407	4284419	4285825	-	J7	4286789	4287103	-964	-1278	314								0.4
Rv3822	Rv3822	1215	4286721	4287935	+	J7	4286789	4287103	68	382	314								1.1
*=sites adjacent to statistically identified sites
																			41 sites with expression ratio >2
